# Supplementary material
Source: publisher figshare collection journal article supplement (https://acs.figshare.com/ndownloader/files/5080558)
Supplement: Supplementary file 1 [file 5080558]

## Supporting Information

We note that in order to obtain the sub-cooled liquid vapor pressures used in Figure 9, the solid vapor pressure of a compound, found in the literature, can be converted to that of the sub-cooled liquid from the following equation (39).

$$\ln \frac{P_s^\circ}{P_L^\circ} = -\frac{\Delta S_{\text{fus}}(T_M)}{R} \left[ \frac{T_M}{T} - 1 \right] \quad (11)$$

where  $P_s^\circ$  is the solid vapor pressure,  $P_L^\circ$  sub-cooled liquid vapor pressure,  $T_m$  is the melting point,  $T$  is the temperature of interest and  $\Delta_{\text{fus}}S$  is the entropy of fusion.

The derivation of equation (8) from equation (6), when  $P \ll P^\circ$  and  $C_{\text{BET}} \gg 1$ , is as follows

$$\frac{n}{n_m} = \frac{C_{\text{BET}} x}{(1-x)(1+(C_{\text{BET}}-1)x)}, x = \frac{P}{P^\circ} \quad (6)$$

Equation (6) simplifies to the following

$$\frac{n}{n_m} \cong \frac{C_{\text{BET}} x}{1 + C_{\text{BET}} x} \quad (12)$$

since  $1-x \approx 1$  and  $C_{\text{BET}} - 1 \approx C_{\text{BET}}$ . Equation (12) can be reformulated as follows

$$\frac{n}{n_m} \cong \frac{C_{\text{BET}} \frac{P}{P^\circ}}{1 + C_{\text{BET}} \frac{P}{P^\circ}} \times \frac{P^\circ}{P^\circ} \cong \frac{C_{\text{BET}} P}{P^\circ + C_{\text{BET}} P} \quad (13)$$

and since  $\frac{n}{n_m} = \frac{\theta}{\theta_m}$  we can equate (13) to the Langmuir isotherm (1) as follows

$$\frac{C_{\text{BET}} P}{P^\circ + C_{\text{BET}} P} \cong \frac{KP}{1 + KP} \quad (14)$$

which simplifies to

$$K \cong \frac{C_{\text{BET}}}{P^{\circ}} \quad (8)$$

- (39) Schwarzenbach, R. P.; Gschwend, P. M.; Imboden, D. M. *Environmental Organic Chemistry*; 2 ed.; Wiley-Interscience: Hoboken, 2003.
